# Supplementary material
Source: PubMed Central journal article supplement (PMC10391280)
Supplement: jmcp.2021.27.7.856_s001.pdf [file jmcp.2021.27.7.856_s001.pdf]

## **SUPPLEMENTARY MATERIALS**

### **Effect of relaxing hepatitis C treatment restrictions on direct-acting antiviral use in a Medicaid program: an interrupted time series analysis**

Megan C Herink, PharmD; Jonah Geddes, MPH; Kim Vo, PharmD; Atif Zaman, MD; and Daniel M Hartung, PharmD, MPH

**Supplementary Table 1: Prior Authorization Criteria Prior to the CMS Notification**

**Supplementary Table 2: Prior Authorization Requirements After the CMS Notification**

**Supplementary Table 1: Prior Authorization Criteria Prior to the CMS Notification**

|                                                                                                                                                                                                                                                                                                                                                               | <b>Requiring biopsy</b> | <b>Minimum fibrosis stage</b> | <b>Specialist required for prescribing</b> | <b>Abstinence from Illicit drugs and EtOH for 6 months</b> | <b>Abstinence from Illicit drugs and EtOH for 12 months</b> | <b>Excluded decompensated cirrhosis</b> | <b>Number of additional restrictive criteria</b> |
|---------------------------------------------------------------------------------------------------------------------------------------------------------------------------------------------------------------------------------------------------------------------------------------------------------------------------------------------------------------|-------------------------|-------------------------------|--------------------------------------------|------------------------------------------------------------|-------------------------------------------------------------|-----------------------------------------|--------------------------------------------------|
| <b>Policy 1</b>                                                                                                                                                                                                                                                                                                                                               | Yes                     | 4                             | Yes                                        |                                                            | X                                                           | Yes                                     | 4                                                |
| <b>Policy 2</b>                                                                                                                                                                                                                                                                                                                                               | No                      | 4                             | Yes                                        | X                                                          |                                                             | Yes                                     | 1                                                |
| <b>Policy 3</b>                                                                                                                                                                                                                                                                                                                                               | No                      | 3                             | Yes                                        | X                                                          |                                                             | Yes                                     | 1                                                |
| <b>Policy 4</b>                                                                                                                                                                                                                                                                                                                                               | No                      | 4                             | No                                         |                                                            | X                                                           | Yes                                     |                                                  |
| <b>Policy 5</b>                                                                                                                                                                                                                                                                                                                                               | No                      | 3                             | Yes                                        | X*                                                         |                                                             | Yes                                     |                                                  |
| <b>Policy 6</b>                                                                                                                                                                                                                                                                                                                                               | Yes                     | 3                             | No*                                        |                                                            | X                                                           | Yes                                     |                                                  |
| <b>Policy 7</b>                                                                                                                                                                                                                                                                                                                                               | No                      | 4                             | No                                         |                                                            | X                                                           | No                                      |                                                  |
| <b>Policy 8</b>                                                                                                                                                                                                                                                                                                                                               | No                      | 4                             | No                                         |                                                            | X                                                           | No                                      |                                                  |
| <b>Policy 9</b>                                                                                                                                                                                                                                                                                                                                               | No                      | 4                             | Yes                                        | X                                                          |                                                             | No                                      |                                                  |
| <b>Policy 10</b>                                                                                                                                                                                                                                                                                                                                              | No                      | 3                             | No                                         |                                                            | X                                                           | No                                      |                                                  |
| <b>Policy 11</b>                                                                                                                                                                                                                                                                                                                                              | No                      | 4                             | N                                          | X                                                          |                                                             | No                                      |                                                  |
| <b>Policy 12</b>                                                                                                                                                                                                                                                                                                                                              | No                      | 4                             | No                                         | X                                                          |                                                             | No                                      |                                                  |
| <b>Policy 13</b>                                                                                                                                                                                                                                                                                                                                              | No                      | 3                             | Yes                                        | X                                                          |                                                             | Yes                                     | 2                                                |
| <b>Policy 14</b>                                                                                                                                                                                                                                                                                                                                              | No                      | 3                             | No                                         |                                                            |                                                             | Yes                                     |                                                  |
| <b>Policy 15</b>                                                                                                                                                                                                                                                                                                                                              | No                      | 3                             | No                                         |                                                            |                                                             | Yes                                     |                                                  |
| <b>Policy 16</b>                                                                                                                                                                                                                                                                                                                                              | No                      | 3                             | No                                         | X                                                          |                                                             | No                                      |                                                  |
| <b>Policy 17</b>                                                                                                                                                                                                                                                                                                                                              | No                      | 3                             | No                                         | X                                                          |                                                             | Yes                                     |                                                  |
| <p>Other criteria include diagnosis requiring a biopsy, requiring decompensated liver disease; requiring extrahepatic manifestations, organ transplant or HIV coinfection; excluding those with decompensated liver disease; excluding those co-infected with hepatitis B or HIV</p> <p>*Only if documented active illicit drug use or active alcohol use</p> |                         |                               |                                            |                                                            |                                                             |                                         |                                                  |

**Supplementary Table 2: Prior Authorization Requirements After the CMS Notification**

|                  | <b>Requiring biopsy</b> | <b>Minimum fibrosis stage</b> | <b>Specialist required for prescribing</b> | <b>Abstinence from Illicit drugs and EtOH for 6 months</b> | <b>Abstinence from Illicit drugs and EtOH for 12 months</b> | <b>Excluded decompensated cirrhosis</b> | <b>Other Restrictive Criteria</b> |
|------------------|-------------------------|-------------------------------|--------------------------------------------|------------------------------------------------------------|-------------------------------------------------------------|-----------------------------------------|-----------------------------------|
| <b>Policy 1</b>  | No                      | 3                             | No                                         |                                                            |                                                             | No                                      |                                   |
| <b>Policy 2</b>  | No                      | 3                             | No                                         |                                                            |                                                             | No                                      |                                   |
| <b>Policy 3</b>  | No                      | 3                             | No                                         |                                                            |                                                             | No                                      |                                   |
| <b>Policy 4</b>  | No                      | 3                             | No                                         |                                                            |                                                             | No                                      |                                   |
| <b>Policy 5</b>  | No                      | 3                             | No                                         |                                                            |                                                             | No                                      |                                   |
| <b>Policy 6</b>  | No                      | 3                             | No                                         | X                                                          |                                                             | No                                      |                                   |
| <b>Policy 7</b>  | No                      | 3                             | No                                         | X*                                                         |                                                             | No                                      |                                   |
| <b>Policy 8</b>  | No                      | 3                             | No                                         | X*                                                         |                                                             | No                                      |                                   |
| <b>Policy 9</b>  | No                      | 3                             | Yes                                        | X                                                          |                                                             | No                                      |                                   |
| <b>Policy 10</b> | No                      | 3                             | No                                         |                                                            | X*                                                          | No                                      |                                   |
| <b>Policy 11</b> | No                      | 3                             | No                                         | X*                                                         |                                                             | No                                      |                                   |
| <b>Policy 12</b> | No                      | 3                             | No                                         | X*                                                         |                                                             | No                                      |                                   |
| <b>Policy 13</b> | No                      | 3                             | Yes                                        | X                                                          |                                                             | No                                      |                                   |
| <b>Policy 14</b> | No                      | 3                             | No                                         |                                                            |                                                             | No                                      |                                   |
| <b>Policy 15</b> | No                      | 3                             | No                                         |                                                            |                                                             | No                                      |                                   |
| <b>Policy 16</b> | No                      | 3                             | No                                         | X*                                                         |                                                             | No                                      |                                   |
| <b>Policy 17</b> | No                      | 3                             | No                                         |                                                            |                                                             | No                                      |                                   |

\*Only if documented active illicit drug use or active alcohol use
